# Supplementary material
Source: MDPI journal article supplement (https://www.mdpi.com/1999-4907/10/10/924)
Supplement: s1 [file s1]

(a) Rubber monoculture

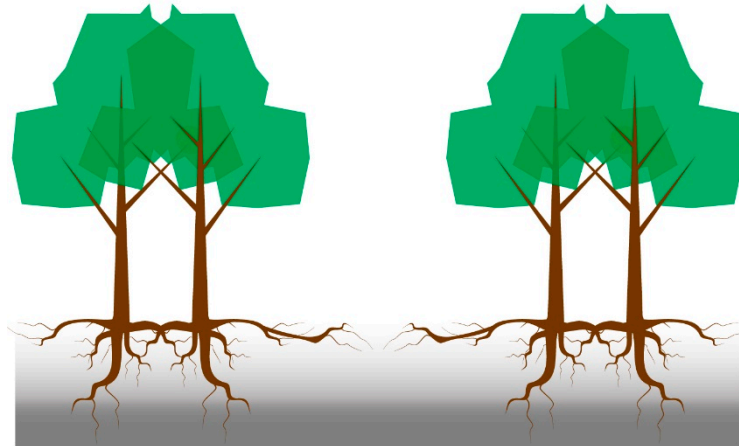

(b) RS-AFS

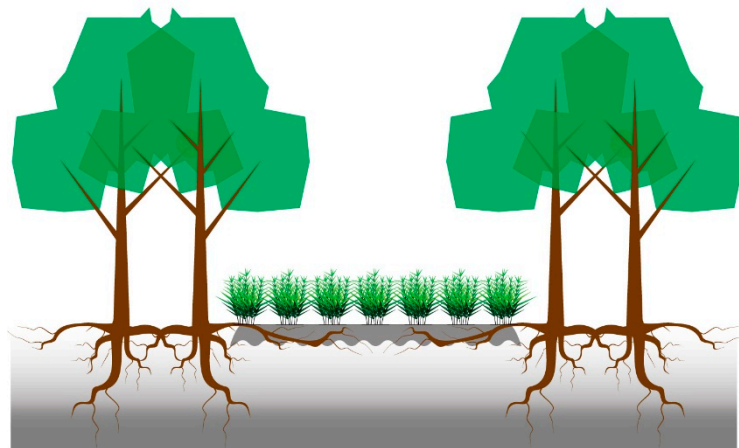

**Figure S1.** Schematic diagrams of (a) the rubber monoculture and (b) the rubber tree and sharp-leaf galangal agroforestry system (RS-AFS).

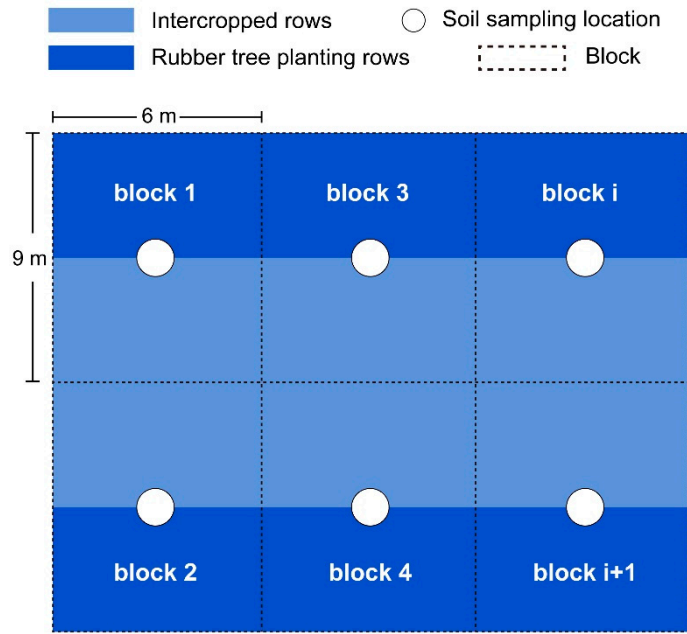

**Figure S2.** Randomly selected blocks for sampling.

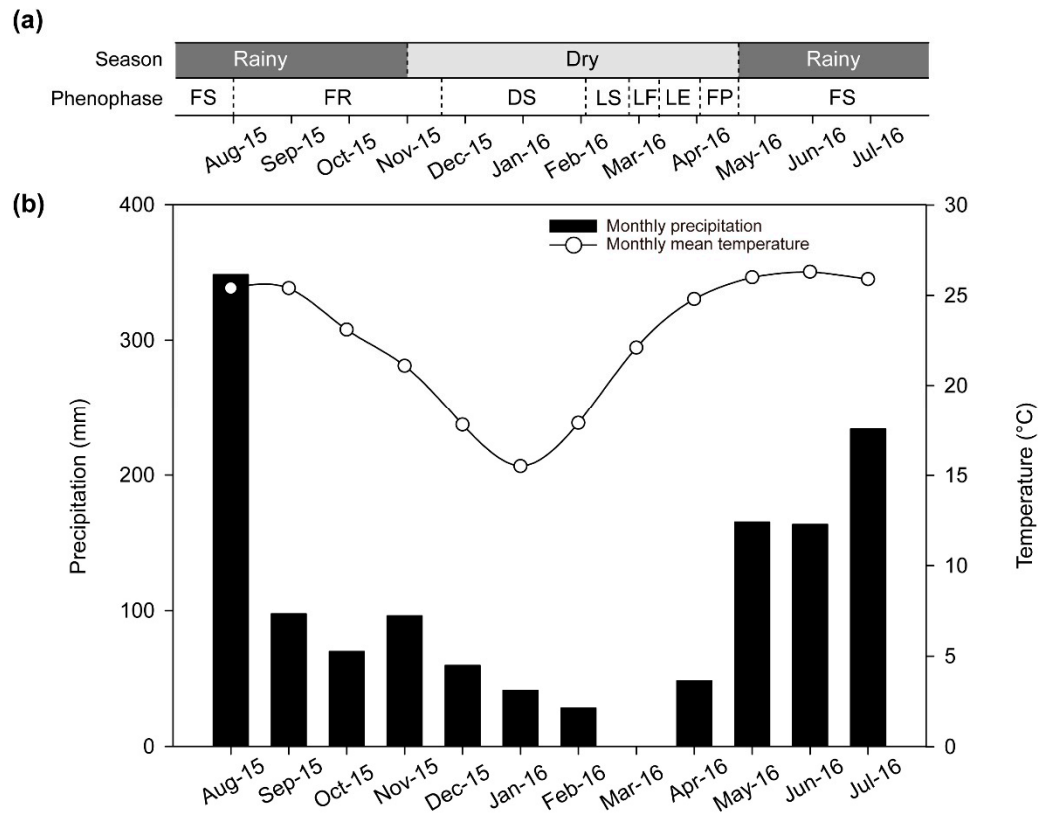

**Figure S3.** (a) The information of the phenophases of rubber tree, and (b) monthly precipitation and monthly mean temperature during the study period (data was provided from Xishuangbanna Station for Tropical Rain Forest Ecosystem Studies). FS represents fruit setting; FR, fruit ripening; DS, dormant stage; LS, leaf shedding; LF, leaf flushing; LE, leaf expansion; and FP, flowering phase.

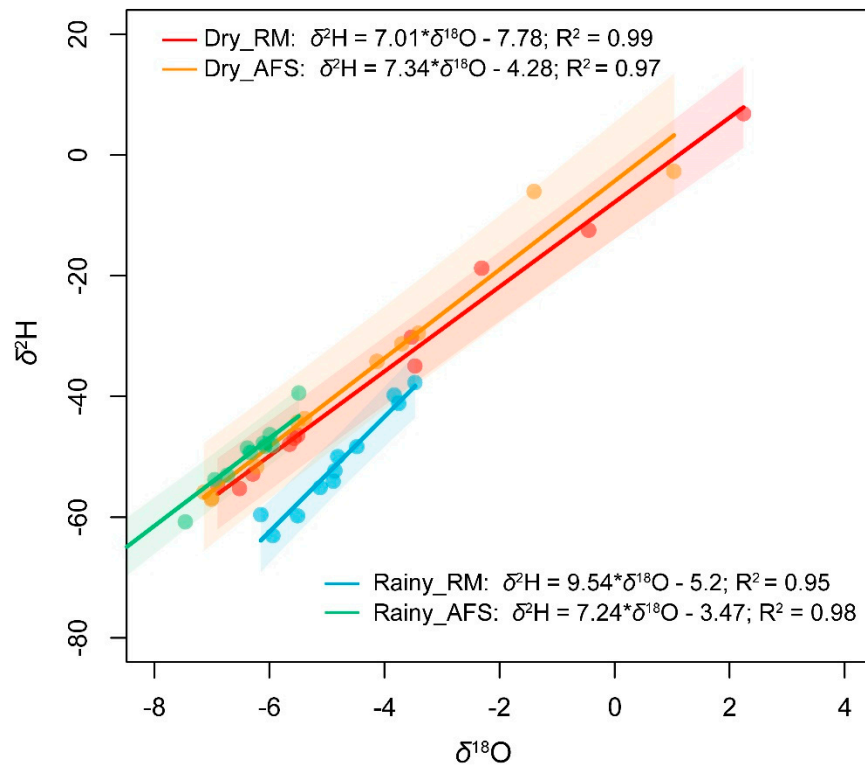

**Figure S4.** Soil water evaporation lines of each site in dry season and rainy season. “Dry\_RM” and “Dry\_AFS” indicate the rubber monoculture and the rubber tree and sharp-leaf galangal agroforestry system in the dry season, respectively. Similarly, “Rainy\_RM” and “Rainy\_AFS” respectively indicate those two sites in the rainy season.
